# Supplementary material
Source: PubMed Central journal article supplement (PMC533046)
Supplement: 7600459s1.pdf [file 7600459s1.pdf]

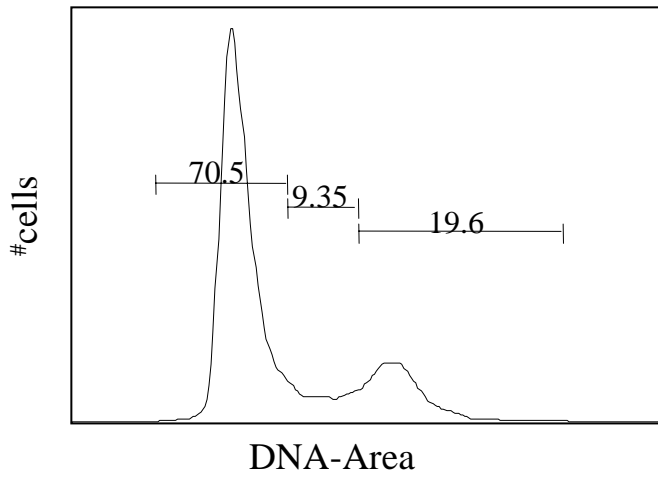

Control

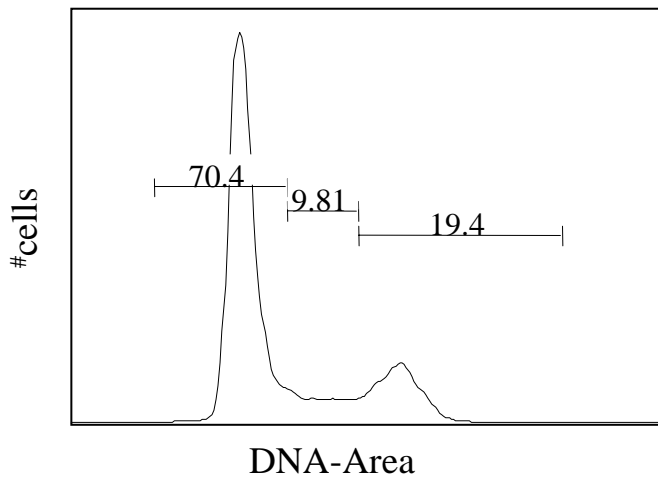

B-Myb siRNA #1

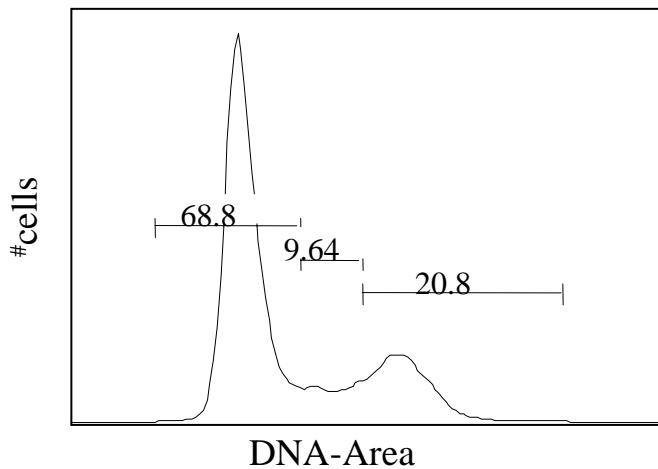

B-Myb siRNA #2

Supplementary Figure 1: Samples were trypsinized 48 hr after siRNA transfection. Cells from two 60-mm plates were pooled, resuspended in 1X PBS, and half of the samples were processed for FACS analysis. The other half was used for western analysis as shown in Figure 7E.
